# Supplementary material for: A cytokine receptor-masked IL2 prodrug selectively activates tumor-infiltrating lymphocytes for potent antitumor therapy
Source: PubMed Central journal article supplement (PMC8119481; doi:10.1038/s41467-021-22980-w), 2021-05-13
Supplement: 41467_2021_22980_MOESM1_ESM.pdf [file 41467_2021_22980_MOESM1_ESM.pdf]

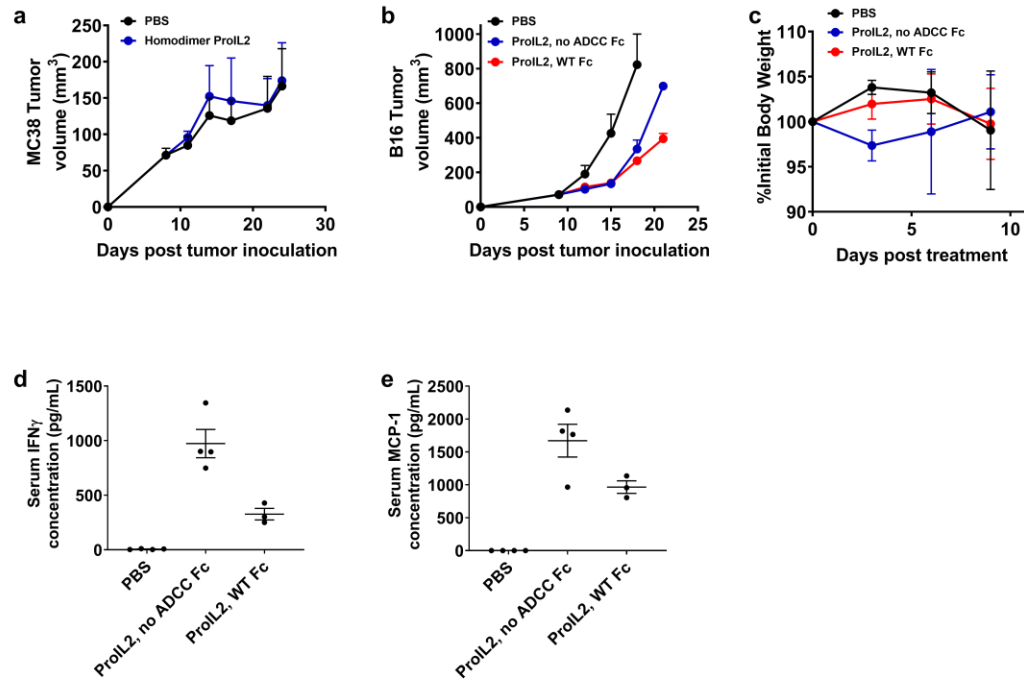

**Supplementary Figure 1. Testing and optimizing ProIL2 designs.** **a** MC38 s.c. tumor bearing mice were injected i.p. with PBS or a homodimeric form of ProIL2 (300 pmol) one time on day 9 post tumor inoculation; tumor growth was measured (n=1 experiment, total 8 individual mice for PBS treatment group, 4 for ProIL2). **b-e** B16 s.c. tumor bearing mice were injected i.p. with PBS, the best ProIL2 candidate with a no ADCC mutant Fc, or the best ProIL2 candidate with a WT hIgG1 Fc (300 pmol) one time on day 9 post tumor inoculation; **b-c** tumor growth and body weight were measured (n=1 experiment, total 4 individual mice per group). **d-e** Serum was collected and isolated from mice 24 hours post treatment, and Cytometric Bead Array was used to quantify the amount of serum IFN $\gamma$  or MCP-1 (n=1 experiment, total 4 individual mice for PBS and ProIL2/no ADCC Fc, 3 for ProIL2/WT Fc). Data represent the mean  $\pm$  s.e.m of replicates.

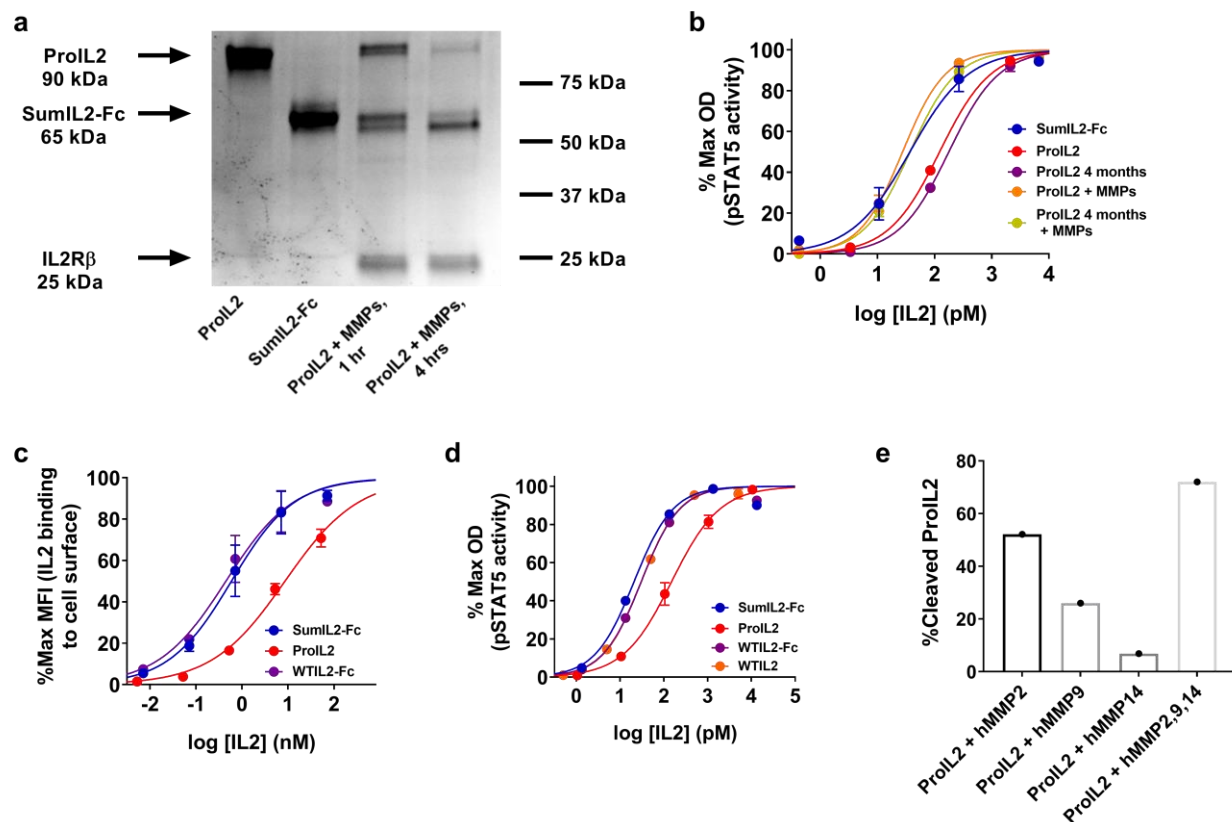

**Supplementary Figure 2. Cleavage of ProIL2 *in vitro*.** **a** ProIL2 was incubated with human MMP2, MMP9, and MMP14 for 1 or 4 hours, then run on non-reducing SDS-PAGE. ProIL2 and SumIL2-Fc were also run as controls. Other SDS-PAGE cleavage experiments (3 times) showed similar relative band intensities. **b** Functional activity of SumIL2-Fc, ProIL2 and ProIL2 that had been in 4°C for 4 months +/- incubation with human MMP2, MMP9, and MMP14 for 4 hours was assessed by using HEK-Blue™ IL-2 Reporter cell assay (n=1 experiment, total 3 replicates per group). **c** Binding of SumIL2-Fc, ProIL2, and WTIL2-Fc at different doses to HEK-Blue™ IL-2 Reporter cells was assessed via flow cytometry (n=2 experiments, total 2 replicates per group). **d** Functional activity of SumIL2-Fc, ProIL2, WTIL2-Fc, and recombinant WTIL2 was assessed by using HEK-Blue™ IL-2 Reporter cell assay (n=1 experiment, total 3 replicates per group). **e** Protease activation of ProIL2. ProIL2 was incubated with human MMP2, MMP9, MMP14, or all 3 MMPs for 4 hours, then run on non-reducing SDS-PAGE, where gel band intensity was subsequently quantified (n=1 replicate per group). Data represent the mean ± s.e.m of replicates.

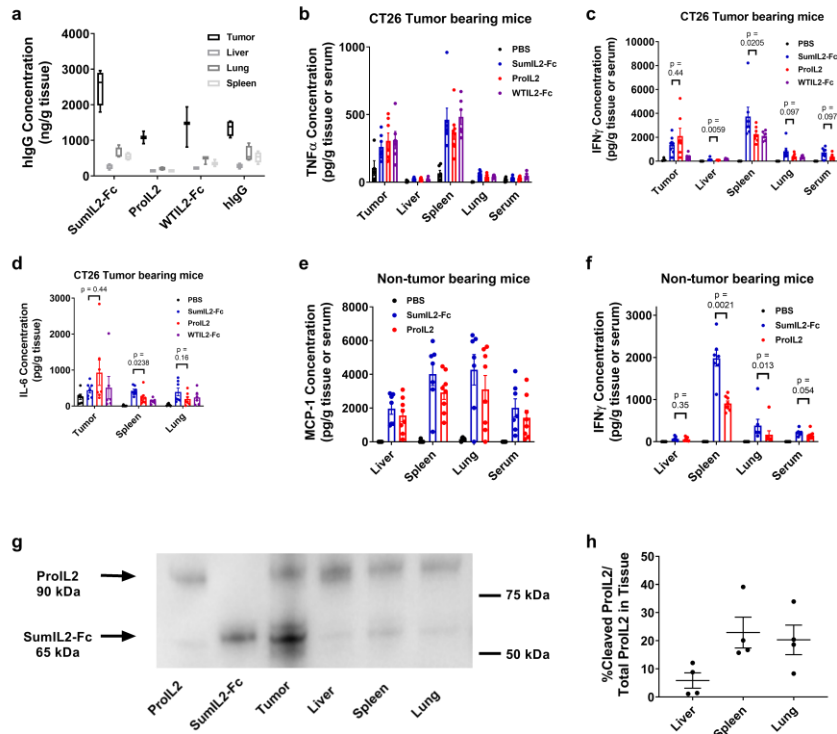

**Supplementary Figure 3. Cleavage and biodistribution of ProIL2 *in vivo*.** **a-b** PBS, 15  $\mu$ g SumIL2-Fc, 20  $\mu$ g ProIL2, 15  $\mu$ g WTIL2-Fc, or 10  $\mu$ g hIgG1 was injected i.p. into CT26 s.c. tumor bearing mice, and the labeled tissues were collected and homogenized 24 hours after treatment. **a** hIgG ELISA was used to quantify the amount ProIL2 in each homogenate, normalized by total tissue weight. Box and whisker plots with maxima, 75<sup>th</sup> percentile, center, 25<sup>th</sup> percentile, and minima are displayed (n=1 experiment, total 4 individual mice for SumIL2-Fc and hIgG treatment groups, 2 for ProIL2, 3 for WTIL2-Fc). **b** Cytometric Bead Array was used to quantify the amount of TNF $\alpha$  in either tissue homogenate or serum (n=2 experiments, total 5 individual mice for PBS treatment group, 7 for SumIL2-Fc and ProIL2, 6 for WTIL2-Fc). **c** PBS, 15  $\mu$ g SumIL2-Fc, or 20  $\mu$ g ProIL2 was injected i.p. into non-tumor bearing BALB/c mice, and the labeled tissues were collected and homogenized 24 hours after treatment. Cytometric Bead Array was used to quantify the amount of TNF $\alpha$  in each tissue homogenate or serum (n=2 experiments, total 5 individual mice for PBS treatment group, 7 for SumIL2-Fc, 8 for ProIL2). **d** 20  $\mu$ g ProIL2 was injected i.p. into CT26 s.c. tumor bearing mice, and the labeled tissues were collected and homogenized 24 hours after treatment. hIgG immunoprecipitation of equivalent weights of tissue homogenate was performed with Protein A binding beads, and then run on Western Blot with hIgG binding antibody. Other Western Blots (from 7 other mice) showed similar relative band intensities. **e** 20  $\mu$ g ProIL2 was injected i.p. into non-tumor bearing BALB/c mice, and the labeled tissues were collected and homogenized 24 hours after treatment. hIgG immunoprecipitation of equivalent weights of tissue homogenate was performed with Protein A binding beads, and then run on Western Blot with hIgG binding antibody (n=1 experiment, total 4 individual mice per group). Relative gel band intensity per lane was quantified. Data represent the mean  $\pm$  s.e.m of replicates. Mann-Whitney U tests were performed to calculate p values.

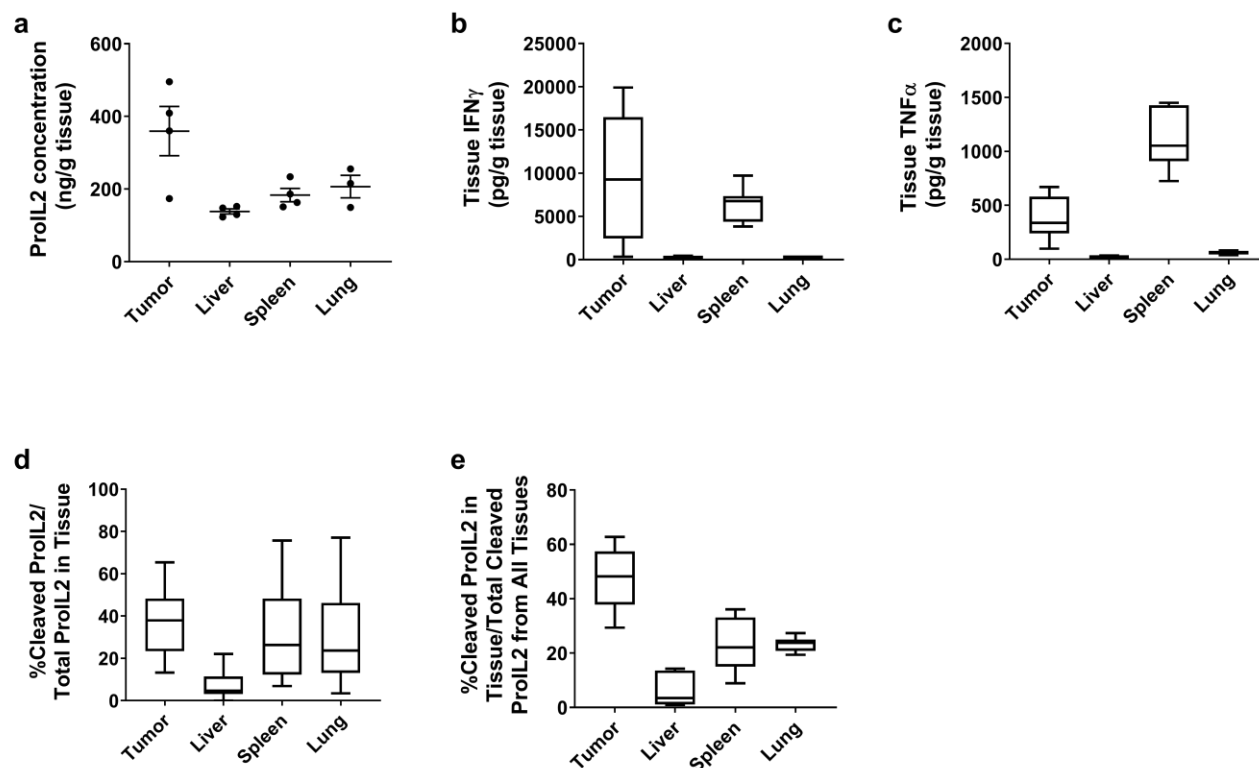

**Supplementary Figure 4. Biodistribution of ProIL2 in B16 tumor bearing mice.** 300 pmol ProIL2 was injected i.p. into B16 s. c. tumor bearing mice, and the labeled tissues were collected and homogenized 24 hours after treatment. **a** hIgG ELISA was used to quantify the amount ProIL2 in each homogenate, normalized by total tissue weight. (n=1 representative experiment of 2, total 3 individual mice per lung group, 4 for others). **b-c** Cytometric Bead Array was used to quantify the amount of IFN $\gamma$  or TNF $\alpha$  in each tissue homogenate (n=2 experiments, total 8 individual mice per group). **d-e** hIgG immunoprecipitation of equivalent weights of tissue homogenate was performed with Protein A binding beads, and then run on Western Blot with hIgG binding antibody. **d** Relative gel band intensity per lane was quantified (n=4 experiments, total 13 individual mice per group). **e** Western Blot relative gel band intensities were quantified, and within each mouse, the total percentage of cleaved ProIL2 between each tissue was compared and quantified (n=2 experiments, total 6 individual mice per group). Box and whisker plots with maxima, 75<sup>th</sup> percentile, center, 25<sup>th</sup> percentile, and minima are displayed. Data represent the mean  $\pm$  s.e.m of replicates.

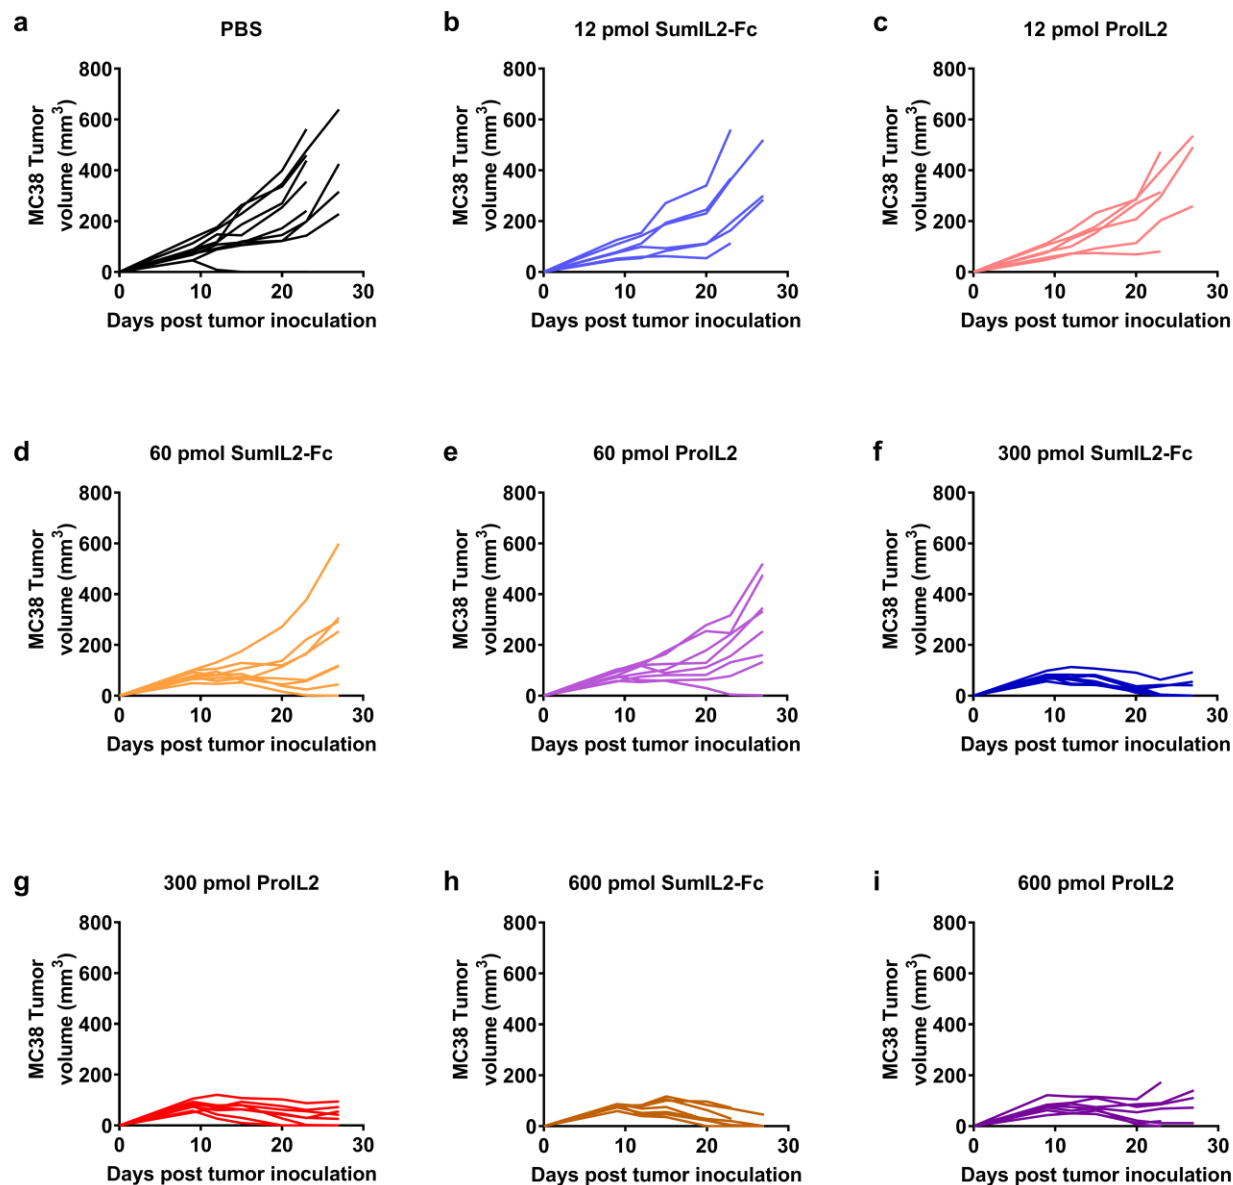

**Supplementary Figure 5. Individual MC38 tumor growth curves for various doses of SumIL2-Fc and ProIL2.** MC38 s.c. tumor bearing mice were injected i.p. with one dose of the labeled treatment on day 9 post tumor inoculation; tumor growth was measured. Each curve displays the MC38 tumor growth in one mouse (n=2 experiments, total 6 individual mice for 12 pmol treatment groups, 7 for 60 pmol treatment groups, 8 for 60 and 300 pmol treatment groups).

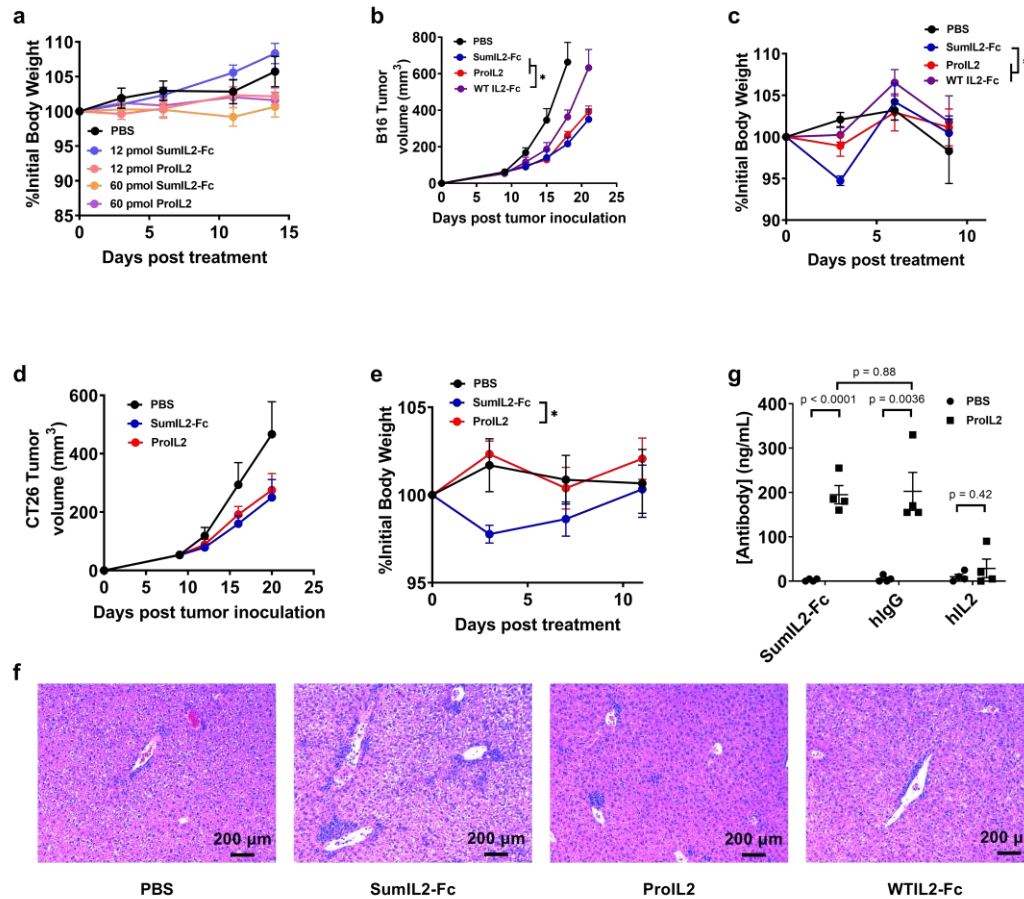

**Supplementary Figure 6. ProIL2 has equivalent antitumor efficacy to SumIL2-Fc with reduced toxicity in multiple tumor models.** **a** MC38 s.c. tumor bearing mice were injected i.p. with one dose of the labeled treatment on day 9 post tumor inoculation; body weight was measured (n=2 experiments, total 6 individual mice for 12 pmol treatment groups, 8 for PBS and 60 pmol treatment groups). **b-c** B16 s.c. tumor bearing mice were injected i.p. with PBS, SumIL2-Fc or ProIL2 (300 pmol) one time on day 9 post tumor inoculation; tumor growth (p = 0.03) and body weight (p = 0.0086) were measured (n=2 experiments, total 4 individual mice for WTIL2-Fc treatment group, 8 for others). **d-e** CT26 s.c. tumor bearing mice were injected i.p. with PBS, SumIL2-Fc or ProIL2 (300 pmol) one time on day 9 post tumor inoculation; tumor growth and body weight (p = 0.0021) were measured (n=1 experiment, total 4 individual mice per group). **f** B16 s.c. tumor bearing mice were injected i.p. with PBS, SumIL2-Fc, ProIL2, or WTIL2-Fc (150 pmol) two times on day 9 and day 12 post tumor inoculation. Livers were extracted and fixed in 10% formalin for 7 days, and then analyzed via H&E stain. Example 10x magnification liver staining from each treatment group is shown. Other liver samples (3 individual mice per treatment group) showed similar results. **g** B16 s.c. tumor bearing mice were injected i.p. with PBS or ProIL2 one time on day 9 post tumor inoculation. Serum was collected 6 days after treatment, and ELISA was used to quantify antibodies against SumIL2-Fc, hIgG, and human recombinant IL-2 as explained in the methods (n=1 experiment, 4 individual mice per group). Data represent the mean  $\pm$  s.e.m of replicates. Student's t tests were performed to calculate p values.

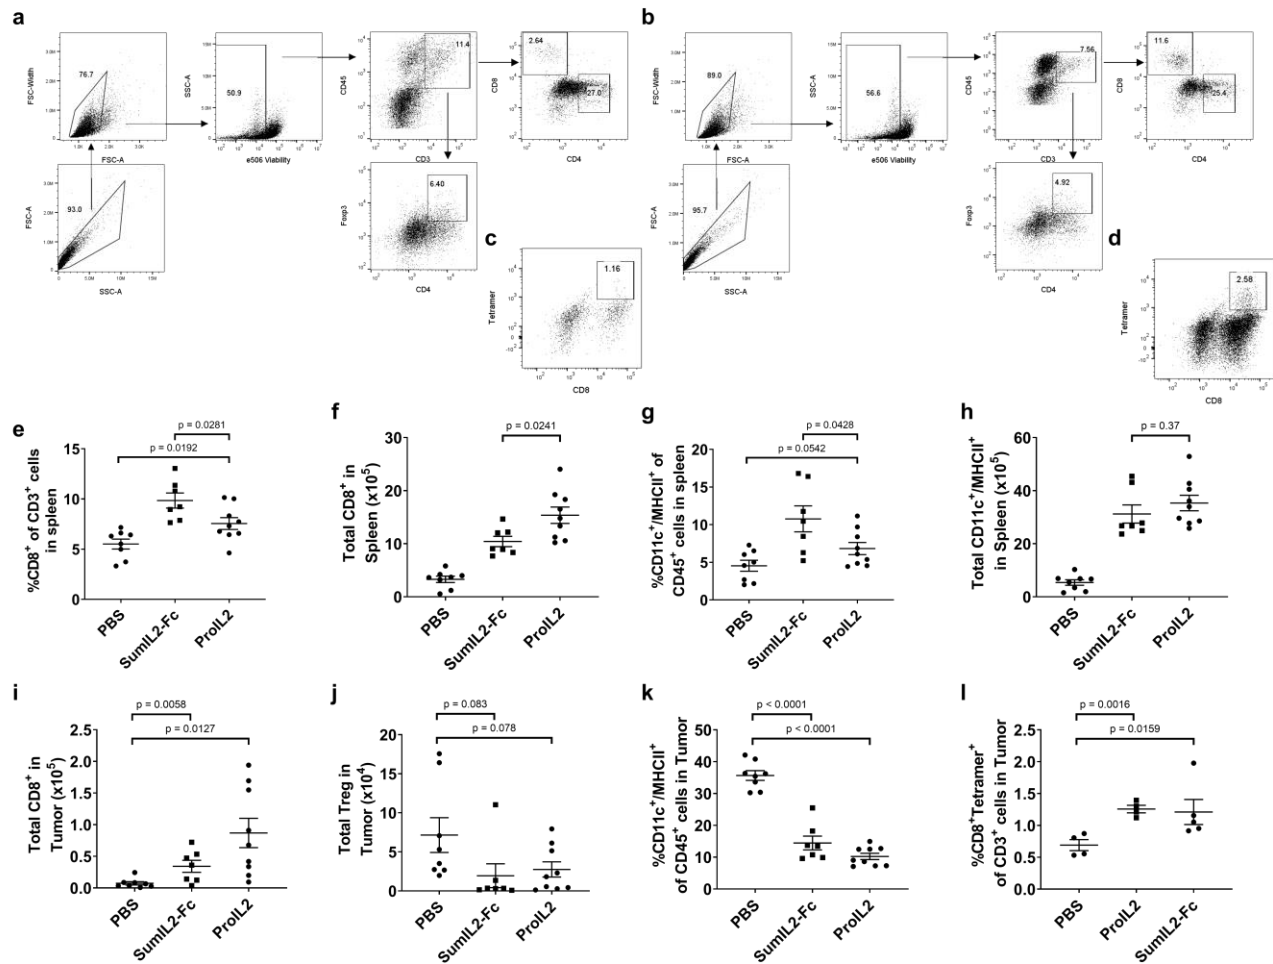

**Supplementary Figure 7. *In vivo* flow cytometry analysis of ProIL2.** B16 s.c. tumor bearing mice were injected i.p. with PBS, SumIL2-Fc or ProIL2 (300 pmol) two times on day 9 and day 12 post tumor inoculation. 48 hours after the last treatment, mice were euthanized and tumors were extracted, digested in collagenase/DNase, and resuspended as single cells. Spleens from these mice were also extracted and resuspended as single cells. Representative flow cytometry gating strategies for CD8<sup>+</sup> T cells and Tregs from tumors from **a** PBS treated and **b** ProIL2 treated mice corresponding to Figures 5a-c are shown. The amounts of each labelled cell population from **e-g** spleens and **h-k** tumors in this figure were quantified (n=2 experiments, total 8 individual mice for PBS treatment group, 7 for SumIL2-Fc, 9 for ProIL2). **c-d** CD8<sup>+</sup> Tetramer<sup>+</sup> gating strategies from B16-OVA mice corresponding to Figure 5e are also shown. Data represent the mean ± s.e.m of replicates. Student's t tests were performed to calculate p values.

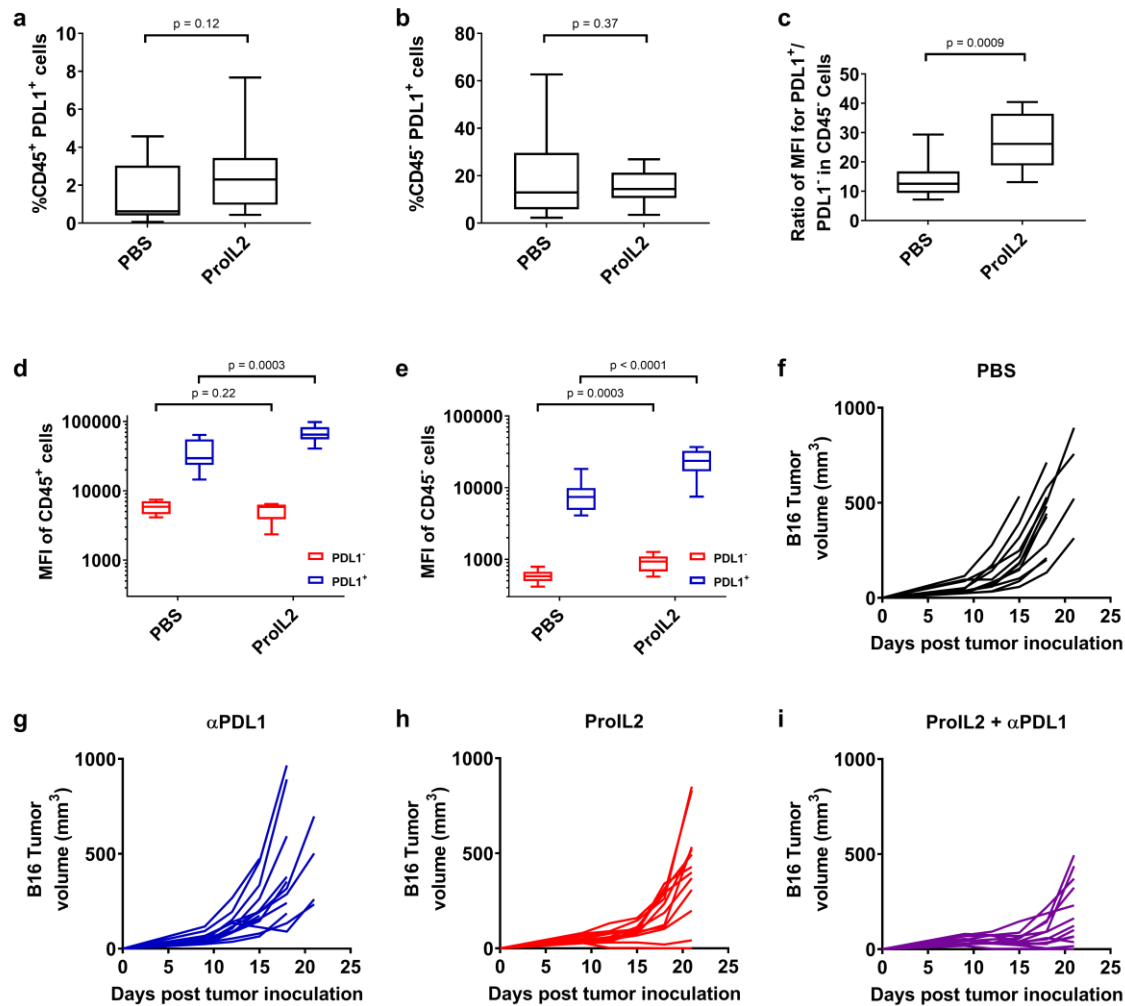

**Supplementary Figure 8. ProIL2 can overcome tumor resistance to ICB.** **a-e** B16 s.c. tumor bearing mice were injected i.p. with PBS or ProIL2 (300 pmol) one time on day 9 post tumor inoculation. 72 hours after treatment, mice were euthanized and tumors were extracted, digested in collagenase/DNase, and resuspended as single cells. Box and whisker plots with maxima, 75<sup>th</sup> percentile, center, 25<sup>th</sup> percentile, and minima are displayed. **a-b** Flow cytometry was used to quantify the total percentage of CD45<sup>+</sup>/PDL1<sup>+</sup> cells or CD45<sup>-</sup>/PDL1<sup>+</sup> cells in each tumor. **c** In CD45<sup>-</sup> cells, the MFI of PDL1<sup>+</sup> and PDL1<sup>-</sup> cells were compared. **d-e** Raw MFI values of CD45<sup>+</sup> and CD45<sup>-</sup> cells are listed (n=3 experiments, total 12 individual mice per group). Data represent the mean ± s.e.m of replicates. Student's t tests were performed to calculate p values. **f-i** B16 s.c. tumor bearing mice were injected i.p. with PBS, anti-PDL1 (200 µg each), ProIL2 (300 pmol), or anti-PDL1 and ProIL2 one time on day 9 post tumor inoculation; tumor growth was measured and individual tumor growth curves are shown (n=3 experiments, total 12 individual mice for PBS and ProIL2 treatment groups, 13 for anti-PDL1 and combination groups).



**Supplementary Table 1. ProIL2 full peptide sequence.**

Sequences used to synthesize each domain of ProIL2 are shown.

|                 |                                                                                                                                                                                                                                              |
|-----------------|----------------------------------------------------------------------------------------------------------------------------------------------------------------------------------------------------------------------------------------------|
| <b>IL2RB</b>    | AVNGTSQFTCFYNSRANISCVWSQDGALQDTSCQVHAWPDRRRWNQTCELLPVSQASWACNLILGAPDSQKLTTV<br>DMTLRVLCREGVRWRVMAIQDFKPFENLRMAPISLQVVHVETHRCNISWEISQASHYFERHLEFEARTLSPGHTWE<br>EAPLLTLKQKQEWICLETLPDTPDQYEFQVRVKPLQGEFTTWSPWSQPLAFRTKPAALGKDT                |
| <b>MMP</b>      | SGARYRWLTA                                                                                                                                                                                                                                   |
| <b>Sequence</b> | SGRSYAILTA                                                                                                                                                                                                                                   |
|                 | SRSGRSPAIFTATG                                                                                                                                                                                                                               |
|                 | GSSGRSPAIFTAGS                                                                                                                                                                                                                               |
|                 | SGFIANPVTA                                                                                                                                                                                                                                   |
| <b>Fc9</b>      | DKTHTCPPCPAPPELLGGPSVFLFPPKPKDTLMISRTPEVTCVVVDVSHEDPEVKFNWYVDGVEVHNAKTKPREEQY<br>NSTYRVVSVLTVLHQDWLNGKEYKCKVSNKALPAPIEKTISKAKGQPREPQVYTLPPCRDELTKNQVSLWCLVKGFY<br>PSDIAVEWESNGQPENNYKTTTPVLDSDGSFFLYSALTVDKSRWQQGNVFSCSVMHEALHNHYTQKSLSLSPG  |
| <b>SumIL2</b>   | APTSSSTKKTQLQLEHLLLDLQMILNGINNYKNPKLTRMLTAKFYMPKKATELKHLCLEEEELKPLEEVLNLAQSKNFH<br>FDPRDVVSNINVFVLELKGSETTFMCEYADETATVEFLNRWITFCQSIISTLT                                                                                                     |
| <b>Fc6</b>      | DKTHTCPPCPAPPELLGGPSVFLFPPKPKDTLMISRTPEVTCVVVDVSHEDPEVKFNWYVDGVEVHNAKTKPREEQY<br>NSTYRVVSVLTVLHQDWLNGKEYKCKVSNKALPAPIEKTISKAKGQPREPQVCTLPSPRDELTKNQVSLSCAVKGFY<br>PSDIAVEWESNGQPENNYKTTTPVLDSDGSFKLVSKLTVDKSRWQQGNVFSCSVMHEALHNHYTQKSLSLSPGK |

**Supplementary Table 2. Key Resources used.**

Key reagents, assays, cell lines, organisms, and DNA are displayed.

| <b>REAGENT or RESOURCE</b>                                                 | <b>SOURCE</b>          | <b>IDENTIFIER</b> |
|----------------------------------------------------------------------------|------------------------|-------------------|
| <b>Antibodies</b>                                                          |                        |                   |
| Anti-PDL1 Atezolizumab                                                     | Genentech              | N/A               |
| Human IgG1(kappa)                                                          | Abbvie                 | N/A               |
| Anti-CD45 (Flow cytometry, 30-F11)                                         | BioLegend              | Cat# 103126       |
| Anti-CD8 (Flow cytometry, 53-6.7)                                          | BioLegend              | Cat# 100730       |
| Anti-CD3 (Flow cytometry, 145-2C11)                                        | BD Biosciences         | Cat# 564379       |
| Anti-CD4 (Flow cytometry, RM4-5)                                           | BD Biosciences         | Cat# 550954       |
| Anti-Foxp3 (Flow cytometry, MF-14)                                         | BioLegend              | Cat# 126408       |
| Anti-PD-L1 (Flow cytometry, 10F.9G2)                                       | BioLegend              | Cat# 124308       |
| Anti-CD11c (Flow cytometry, N418)                                          | BioLegend              | Cat# 117306       |
| Anti-MHCII (Flow cytometry, M5.114.15.2)                                   | eBioscience            | Cat# 56-5321-82   |
| Fixable Viability Dye eFluor™ 506                                          | Thermo Fisher          | Cat# 65-0866-18   |
| Anti-FcγIII/II receptor (clone 2.4G2)                                      | BD Biosciences         | Cat# 553141       |
| Goat Anti-Human IgG-HRP                                                    | Santa Cruz Biotech     | Cat# sc-2453      |
| iTag Tetramer/PE - H-2 Kb OVA (SIINFEKL)                                   | MBL                    | Cat# TB-5001-1    |
| AffiniPure Goat Anti-Human IgG, Fcγ fragment specific                      | Jackson ImmunoResearch | Cat# 109-005-098  |
| Alkaline Phosphatase-AffiniPure Goat Anti-Human IgG, Fcγ fragment specific | Jackson ImmunoResearch | Cat# 109-055-098  |
| Peroxidase-AffiniPure Goat Anti-Mouse IgG, Fcγ fragment specific           | Jackson ImmunoResearch | Cat# 115-035-071  |
| Donkey Anti-Human IgG (H+L)                                                | Jackson ImmunoResearch | Cat# 709-116-149  |
| Purified Mouse Anti-Human IgG                                              | BD Biosciences         | Cat# 555784       |
| <b>Chemicals, Peptides, and Recombinant Proteins</b>                       |                        |                   |
| FTY720 (hydrochloride)                                                     | Selleckchem            | Cat# S5002        |
| Dulbecco's Modified Eagle's Medium                                         | Sigma- Aldrich         | Cat# D6429        |
| Collagenase type I                                                         | Sigma                  | Cat# C0130        |
| DNase I                                                                    | Roche                  | Cat# 11284932001  |
| OVA257-264 (SIINFEKL)                                                      | Invivogen              | Cat# vac-sin      |
| Recombinant human IL-2 (aldesleukin)                                       | Prometheus             | N/A               |
| 6-Thioguanine, 98%, Alfa Aesar                                             | Thermo Fisher          | Cat# AAB2128003   |
| Recombinant Human MMP-2 (carrier-free)                                     | BioLegend              | Cat# 554302       |
| Recombinant Human MMP-9 (carrier-free)                                     | BioLegend              | Cat# 550502       |
| 4-Aminophenylmercuric acetate                                              | Sigma-Aldrich          | Cat# A9563        |
| Recombinant Human MMP-14/MT1-MMP (NS0-expressed) Protein, CF               | R&D Systems            | Cat# 918-MPN-010  |
| Recombinant Human Active Trypsin 3/PRSS3 Protein, CF                       | R&D Systems            | Cat# 3714-SE-010  |

|                                 |                                                                                                               |               |
|---------------------------------|---------------------------------------------------------------------------------------------------------------|---------------|
| AEBSF, CF                       | R&D Systems                                                                                                   | Cat# EI001    |
| QUANTI-Blue™                    | InvivoGen                                                                                                     | Cat# rep-qbs  |
| Experimental Models: Cell Lines |                                                                                                               |               |
| B16                             | ATCC                                                                                                          | Cat# CRL-6322 |
| MC38                            | ATCC                                                                                                          | N/A           |
| CT26                            | ATCC                                                                                                          | Cat# CRL-2638 |
| 4T1                             | ATCC                                                                                                          | Cat# CRL-2539 |
| FreeStyle™ 293-F                | Thermo Fisher                                                                                                 | Cat# R79007   |
| HEK-Blue™ IL-2 Cells            | InvivoGen                                                                                                     | Cat# hkb-il2  |
| Key Oligonucleotides/Primers    |                                                                                                               |               |
| IL2 Forward                     | ATTTTCGCGAGCCCCTACAAGCAGCAGC<br>ACCA                                                                          |               |
| IL2 Reverse                     | ATTTTCGAAGGTCAGTGTGCTGATGAT<br>GCTCTGGC                                                                       |               |
| IL2RB Forward                   | ATTTTCGCGAGCCGTGAATGGCACCA                                                                                    |               |
| IL2RB Reverse                   | ATTTTCGAATGTGTCCTTGCCCA                                                                                       |               |
| MMP Fc Forward Seq 1            | ATTATTTTCGAAGGTGGCGGTGGATCCT<br>CTAGAAGCGGCAGGTCTCCTGCCATCT<br>TTACAGCCGGTGGCGGTGGATCC<br>GACAAAACCTCAC       |               |
| MMP Fc Forward Seq 2            | ATTTTCGAAGGTGGCGGTGGATCCAGC<br>GGCGCCAGGTACAGGTGGCTGACCGC<br>CGGCTCTAGCGGAGGATCC<br>GACAAAACCTCAC             |               |
| MMP Fc Forward Seq 3            | ATTATTTTCGAAGGTGGCGGTGGATCCT<br>CTAGAAGCGGCAGGTCTCCTGCCATCT<br>TTACAGCCACCGGTGGTGGCGGTGGAT<br>CCGACAAAACCTCAC |               |
| GS Fc Forward                   | ATTTTCGAAGGTGGCGGTGGATCCGGT<br>GGCGGTGGATCCGGTGGCGGTGGATC<br>CGGCTCTAGCGGAGGATCCGACAAA<br>CTCAC               |               |
| Fc Reverse                      | ATGGCTGATTATGATCAATGAATT                                                                                      |               |
| Recombinant DNA                 |                                                                                                               |               |
| Plasmid: pEE6.4-IL2Rβ-MMP-Fc9   |                                                                                                               |               |
| Plasmid: pEE6.4-SumIL2-Fc6      |                                                                                                               |               |
| Plasmid: pEE6.4-Fc9             |                                                                                                               |               |
| Plasmid: pEE6.4-WTIL2-Fc6       |                                                                                                               |               |
