# Supplementary material for: A cytokine receptor-masked IL2 prodrug selectively activates tumor-infiltrating lymphocytes for potent antitumor therapy
Source: PubMed Central journal article supplement (PMC8119481; doi:10.1038/s41467-021-22980-w), 2021-05-13
Supplement: 41467_2021_22980_MOESM2_ESM.pdf [file 41467_2021_22980_MOESM2_ESM.pdf]

## Reporting Summary

Nature Research wishes to improve the reproducibility of the work that we publish. This form provides structure for consistency and transparency in reporting. For further information on Nature Research policies, see our [Editorial Policies](#) and the [Editorial Policy Checklist](#).

### Statistics

For all statistical analyses, confirm that the following items are present in the figure legend, table legend, main text, or Methods section.

n/a Confirmed

- The exact sample size ( $n$ ) for each experimental group/condition, given as a discrete number and unit of measurement
- A statement on whether measurements were taken from distinct samples or whether the same sample was measured repeatedly
- The statistical test(s) used AND whether they are one- or two-sided  
*Only common tests should be described solely by name; describe more complex techniques in the Methods section.*
- A description of all covariates tested
- A description of any assumptions or corrections, such as tests of normality and adjustment for multiple comparisons
- A full description of the statistical parameters including central tendency (e.g. means) or other basic estimates (e.g. regression coefficient) AND variation (e.g. standard deviation) or associated estimates of uncertainty (e.g. confidence intervals)
- For null hypothesis testing, the test statistic (e.g.  $F$ ,  $t$ ,  $r$ ) with confidence intervals, effect sizes, degrees of freedom and  $P$  value noted  
*Give  $P$  values as exact values whenever suitable.*
- For Bayesian analysis, information on the choice of priors and Markov chain Monte Carlo settings
- For hierarchical and complex designs, identification of the appropriate level for tests and full reporting of outcomes
- Estimates of effect sizes (e.g. Cohen's  $d$ , Pearson's  $r$ ), indicating how they were calculated

*Our web collection on [statistics for biologists](#) contains articles on many of the points above.*

### Software and code

Policy information about [availability of computer code](#)

Data collection

Data analysis

For manuscripts utilizing custom algorithms or software that are central to the research but not yet described in published literature, software must be made available to editors and reviewers. We strongly encourage code deposition in a community repository (e.g. GitHub). See the Nature Research [guidelines for submitting code & software](#) for further information.

### Data

Policy information about [availability of data](#)

All manuscripts must include a [data availability statement](#). This statement should provide the following information, where applicable:

- Accession codes, unique identifiers, or web links for publicly available datasets
- A list of figures that have associated raw data
- A description of any restrictions on data availability

### Field-specific reporting

## Life sciences study design

All studies must disclose on these points even when the disclosure is negative.

|                 |                                                                                                                                                                                                                                                                                        |
|-----------------|----------------------------------------------------------------------------------------------------------------------------------------------------------------------------------------------------------------------------------------------------------------------------------------|
| Sample size     | Sample sizes were determined from the similar experiments in the former publications of the group. Power analysis calculations were also performed as described in the statistical analysis section of the methods to determine the minimum number of samples necessary for 80% power. |
| Data exclusions | No data were excluded.                                                                                                                                                                                                                                                                 |
| Replication     | At least 2 independent experiments were performed for each figure panel. The performed replications were successful.                                                                                                                                                                   |
| Randomization   | Mice in this study were matched with age and tumor size, and were randomly allocated to the different groups.                                                                                                                                                                          |
| Blinding        | Collection of replicate animal samples was not blinded in order to properly collect paired tissue/serum at different time points. However, data collection (i.e. tumor growth, flow cytometry) and analysis were blinded.                                                              |

## Reporting for specific materials, systems and methods

We require information from authors about some types of materials, experimental systems and methods used in many studies. Here, indicate whether each material, system or method listed is relevant to your study. If you are not sure if a list item applies to your research, read the appropriate section before selecting a response.

### Materials & experimental systems

| n/a                                 | Involved in the study                                           |
|-------------------------------------|-----------------------------------------------------------------|
| <input type="checkbox"/>            | <input checked="" type="checkbox"/> Antibodies                  |
| <input type="checkbox"/>            | <input checked="" type="checkbox"/> Eukaryotic cell lines       |
| <input checked="" type="checkbox"/> | <input type="checkbox"/> Palaeontology and archaeology          |
| <input type="checkbox"/>            | <input checked="" type="checkbox"/> Animals and other organisms |
| <input checked="" type="checkbox"/> | <input type="checkbox"/> Human research participants            |
| <input checked="" type="checkbox"/> | <input type="checkbox"/> Clinical data                          |
| <input checked="" type="checkbox"/> | <input type="checkbox"/> Dual use research of concern           |

### Methods

| n/a                                 | Involved in the study                              |
|-------------------------------------|----------------------------------------------------|
| <input checked="" type="checkbox"/> | <input type="checkbox"/> ChIP-seq                  |
| <input type="checkbox"/>            | <input checked="" type="checkbox"/> Flow cytometry |
| <input checked="" type="checkbox"/> | <input type="checkbox"/> MRI-based neuroimaging    |

## Antibodies

|                 |                                                                                                                                                                                                                                                                                                                                                                                                                                                                                                                                                                                                                                                                                                                                                                                                                                                                                                                                                      |
|-----------------|------------------------------------------------------------------------------------------------------------------------------------------------------------------------------------------------------------------------------------------------------------------------------------------------------------------------------------------------------------------------------------------------------------------------------------------------------------------------------------------------------------------------------------------------------------------------------------------------------------------------------------------------------------------------------------------------------------------------------------------------------------------------------------------------------------------------------------------------------------------------------------------------------------------------------------------------------|
| Antibodies used | BD Biosciences anti-mouse FcγIII/II receptor (2.4G2), BioLegend anti-mouse CD45 (30-F11), BioLegend anti-mouse CD8 (53-6.7), BD Biosciences anti-mouse CD3 (145-2C11), BD Biosciences anti-mouse CD4 (RM4-5), BioLegend anti-mouse Foxp3 (MF-14), BioLegend anti-mouse PD-L1 (10F.9G2), BioLegend anti-mouse CD11c (N418), eBioscience anti-mouse MHCII (M5.114.15.2), Thermo Fisher Fixable Viability Dye eFluor 506, Santa Cruz Biotech Goat anti-human IgG-HRP, MBL iTag Tetramer/PE - H-2 Kb OVA (SIINFEKL), Jackson ImmunoResearch AffiniPure Goat Anti-human IgG Fcγ fragment specific, Jackson ImmunoResearch Alkaline Phosphatase-AffiniPure Goat Anti-Human IgG Fcγ fragment specific, Jackson ImmunoResearch Peroxidase-AffiniPure Goat Anti-Mouse IgG Fcγ fragment specific, Jackson ImmunoResearch Donkey Anti-Human IgG (H+L), BD Biosciences Purified Mouse Anti-Human IgG, Genentech anti-PDL1 Atezolizumab, Abbvie Human IgG1(kappa) |
| Validation      | Antibody validations (i.e. knockout and knockdown testing, flow cytometry application, etc.) were performed by suppliers and have been published by our group and others. Please see BioLegend, BD Biosciences, and Jackson ImmunoResearch manufacturer websites for validation data (i.e. <a href="https://www.biolegend.com/en-us/kokd-validation">https://www.biolegend.com/en-us/kokd-validation</a> ).                                                                                                                                                                                                                                                                                                                                                                                                                                                                                                                                          |

## Eukaryotic cell lines

Policy information about [cell lines](#)

|                                                                   |                                                                                                                                                                            |
|-------------------------------------------------------------------|----------------------------------------------------------------------------------------------------------------------------------------------------------------------------|
| Cell line source(s)                                               | ATCC (B16, MC38, CT26, 4T1)                                                                                                                                                |
| Authentication                                                    | The cell lines obtained from ATCC with responsive authentication and characterization. Morphology, karyotyping, and PCR analysis were used to authenticate each cell line. |
| Mycoplasma contamination                                          | All the cell lines used in this study was tested negative for mycoplasma contamination.                                                                                    |
| Commonly misidentified lines (See <a href="#">ICLAC</a> register) | None                                                                                                                                                                       |

## Animals and other organisms

Policy information about [studies involving animals](#); [ARRIVE guidelines](#) recommended for reporting animal research

|                         |                                                                                                                                                                                                                                                                                                                                             |
|-------------------------|---------------------------------------------------------------------------------------------------------------------------------------------------------------------------------------------------------------------------------------------------------------------------------------------------------------------------------------------|
| Laboratory animals      | 8 week old female C57BL/6J and BALB/c mice were purchased from The Jackson Laboratory. All mice were maintained under specific pathogen-free conditions at the University of Texas Southwestern Medical Center. Animal care and experiments were carried out under institutional and National Institutes of Health protocol and guidelines. |
| Wild animals            | The study did not involve wild animals.                                                                                                                                                                                                                                                                                                     |
| Field-collected samples | The study did not involve field-collected samples                                                                                                                                                                                                                                                                                           |
| Ethics oversight        | This study has been approved by the Institutional Animal Care and Use Committee of the University of Texas Southwestern Medical Center.                                                                                                                                                                                                     |

Note that full information on the approval of the study protocol must also be provided in the manuscript.

## Flow Cytometry

### Plots

Confirm that:

- The axis labels state the marker and fluorochrome used (e.g. CD4-FITC).
- The axis scales are clearly visible. Include numbers along axes only for bottom left plot of group (a 'group' is an analysis of identical markers).
- All plots are contour plots with outliers or pseudocolor plots.
- A numerical value for number of cells or percentage (with statistics) is provided.

### Methodology

|                           |                                                                                                                                                                                                                                                                                                            |
|---------------------------|------------------------------------------------------------------------------------------------------------------------------------------------------------------------------------------------------------------------------------------------------------------------------------------------------------|
| Sample preparation        | Tumor tissues were excised and digested with 1 mg/mL Collagenase I (Sigma) and 0.5 mg/mL DNase I (Roche) in the 37°C for 30mins, tumor was then passed through a 70 µm cell strainer to remove large pieces of undigested tumor. Tumor infiltrating cells were washed twice with PBS containing 2 mM EDTA. |
| Instrument                | Beckman Coulter CytoFlex                                                                                                                                                                                                                                                                                   |
| Software                  | Beckman Coulter CytExpert                                                                                                                                                                                                                                                                                  |
| Cell population abundance | Physical parameter and Thermo Fisher Fixable Viability Dye was used to exclude dead cells. Positive populations were defined using not stained cells as reference. Isotype controls were used to confirm the specificity of the staining.                                                                  |
| Gating strategy           | Positive populations were defined using not stained cells as reference. Isotype controls were used to confirm the specificity of the staining.                                                                                                                                                             |

- Tick this box to confirm that a figure exemplifying the gating strategy is provided in the Supplementary Information.
